# Supplementary material for: Preferred Place of End-of-Life Care Based on Clinical Scenario: A Cross-Sectional Study of a General Japanese Population
Source: MDPI journal article supplement (doi:10.3390/healthcare11030406), 2023-01-31
Supplement: s1 [file s1]

**Table S1.** The results of the chi-square test and Pearson's residual.

|                         | Home    | Nursing home | Medical facility | Total  |
|-------------------------|---------|--------------|------------------|--------|
| Cancer                  | 441     | 97           | 351              | 889    |
|                         | 49.61   | 10.91        | 39.48            | 100.00 |
|                         | 282.333 | 250.000      | 356.667          |        |
|                         | 9.443   | -9.677       | -0.300           |        |
| End-stage heart disease | 271     | 168          | 450              | 889    |
|                         | 30.48   | 18.90        | 50.62            | 100.00 |
|                         | 282.333 | 250.000      | 356.667          |        |
|                         | -0.674  | -5.186       | 4.942            |        |
| Dementia                | 135     | 485          | 269              | 889    |
|                         | 15.19   | 54.56        | 30.26            | 100.00 |
|                         | 282.333 | 250.000      | 356.667          |        |
|                         | -8.768  | 14.863       | -4.642           |        |
| Total                   | 847     | 750          | 1070             | 2667   |
|                         | 31.76   | 28.12        | 40.12            | 100.00 |

The numbers in one cell in rows are N, percentage, expected number, and Pearson's residual.
